# Supplementary material for: Population Pharmacokinetics of Colistin Sulfate in Critically Ill Patients: Exposure and Clinical Efficacy
Source: Frontiers journal article supplement (doi:10.3389/fphar.2022.915958), 2022-06-16
Supplement: Data_Sheet_1.PDF [file Data_Sheet_1.PDF]

**Table S1 Population pharmacokinetic parameter estimates from the base model**

| Parameter                                            | Estimate | RSE | shrinkage |
|------------------------------------------------------|----------|-----|-----------|
| <b>Fixed Effects</b>                                 |          |     |           |
| TVCL[L/h]                                            | 1.63     | 7%  |           |
| TVV[L]                                               | 20.6     | 10% |           |
| <b>Between-subject Variability (BSV<sup>a</sup>)</b> |          |     |           |
| BSV_CL [%CV]                                         | 38.70%   | 14% | 6%        |
| <b>Residual Variability (RV)</b>                     |          |     |           |
| Proportional Error [%CV]                             | 26%      | 16% | 15%       |

<sup>a</sup>BSV calculated as  $\sqrt{e^{\omega^2} - 1}$

**Table S2 Linezolid PopPK parameter estimates from the final model and bootstrap results**

| Parameter                    | Final model |        | shrinkage        |                 |                               | Bias (%) |
|------------------------------|-------------|--------|------------------|-----------------|-------------------------------|----------|
|                              | Estimate    | RSE(%) | 2.5th percentile | Median Estimate | 97.5 <sup>th</sup> percentile |          |
| $\theta_{CL}$ [L/h]          | 0.994       | 16     | 0.67             | 0.98            | 1.32                          | -1.34    |
| $\theta_V$ [L]               | 20.7        | 10     | 16.45            | 20.91           | 24.85                         | 1.00     |
| CrCL on CL ( $\theta_1$ )    | 0.525       | 22     | 0.28             | 0.53            | 0.77                          | 1.20     |
| Inter-individual variability |             |        |                  |                 |                               |          |
| $\omega_{CL}$ [%]            | 30.4        | 30     | 19.24            | 29.52           | 38.39                         | -2.91    |
| Residual Variability         |             |        |                  |                 |                               |          |
| $\sigma_{pro}$ (%)           | 25.1        | 16     | 20.82            | 24.85           | 28.74                         | -0.99    |

PopPK, population pharmacokinetic; RSE(%), relative standard error;  $\theta_{CL}$ , typical value of apparent clearance;  $\theta_V$ , typical value of apparent volume of distribution;  $\theta_1$ , allometric value for CrCL as covariate for CL;  $\omega_{CL}$ , square root of inter-individual variance for CL;  $\sigma_{pro}$ , residual variability for proportional error.

Bias (%)=(Median Estimate<sub>Bootstrap</sub> - Estimate<sub>Final model</sub>)/Estimate<sub>Final model</sub>×100%

**Figure S1**

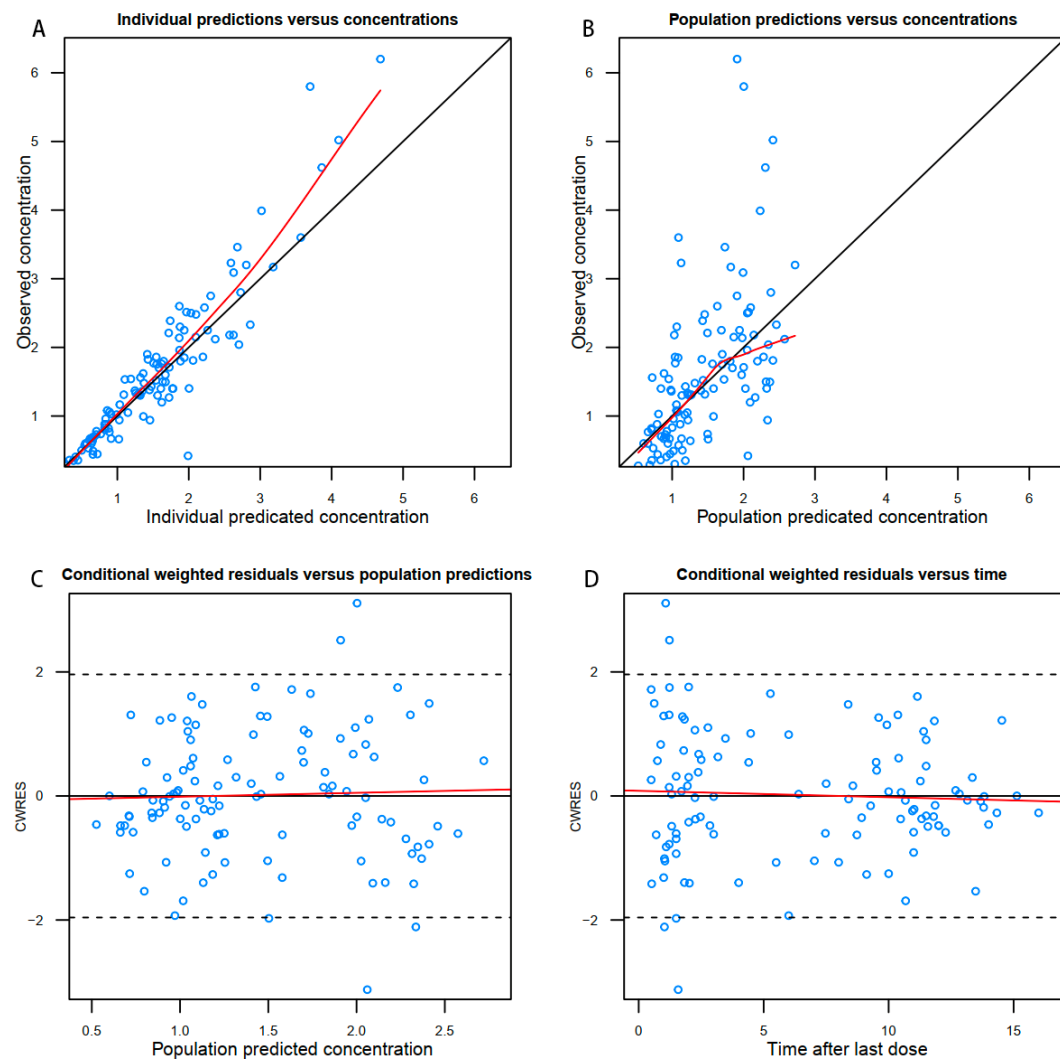

Figure S1. Diagnostic goodness-of-fit plots of the base model. (A) Observed concentration (DV) vs. individual predicted concentration (IPRED); (B) DV vs. population predicted concentration (PRED); (C) conditional weighted residuals (CWRES) vs. PRED; and (D) CWRES vs. time. The red lines in the upper panel represent loess smooth lines and linear fit lines, respectively.

**Figure S2**

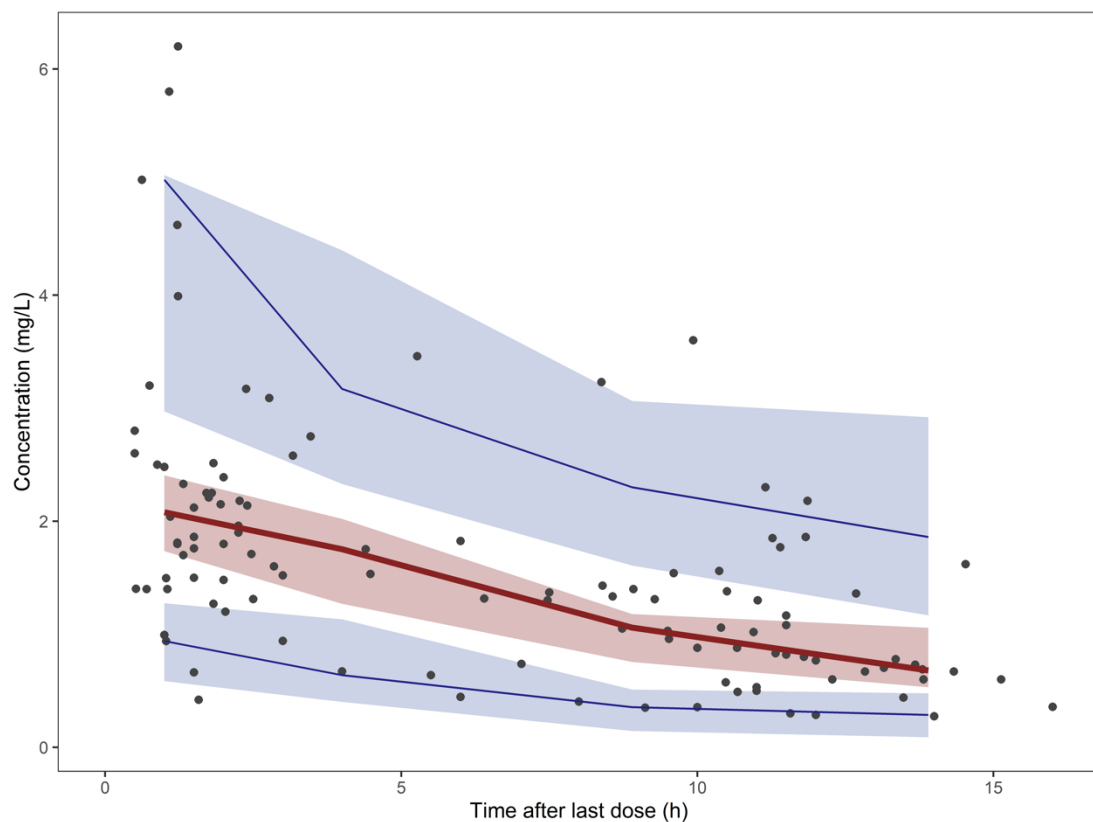

Figure S2. Prediction- and variability-corrected visual predictive check (pvcVPC) plot of the final model. The red solid lines represent the median observed concentration, and the semitransparent red fields represent the simulation-based 95% confidence intervals (CIs) for the median. The observed 5th and 95th percentiles are represented by red dashed lines, and the 90% CIs for the corresponding model predicted percentiles are shown as semitransparent blue fields. The observed concentrations are represented by dark dots.
